# Supplementary material for: Oncometabolic Surgery: The Metabolic Effects and Effectiveness of the Different Reconstruction Methods used in Gastric Cancer Surgery. A Systematic Review and Meta-Analysis
Source: Research Square preprint supplement (doi:10.21203/rs.3.rs-4586558/v1), 2024-07-19
Supplement: Supplementary file 1 [file 4d647cf10755e992f4dfb698.docx]

| **Study, Year** | **Country** | **Study Design** | **Nº**  **Patients** | **Mean Age (years)** | **Male (%)** | **Mean Follow-up (months)** | **GC**  **Staging** | **Intervention**  **Type** | **Mean BMI**  **(kg/m2)** | **BMI**  **Reductio**  **Ratio (%)** | **Mean HbA1c (%)** | **Mean FPG**  **(mg/dL)** | **Mean Duration of T2DM (months)** | **Mean SBP (mmHg)** | **Mean DBP (mmHg)** | **Mean TC (mg/dL)** | **Mean LDL (mg/dL)** | **Mean HDL (mg/dL)** | **Mean TG (mg/dL)** | **Mean SFA (cm2)** | **Mean VFA (cm2)** |
| --- | --- | --- | --- | --- | --- | --- | --- | --- | --- | --- | --- | --- | --- | --- | --- | --- | --- | --- | --- | --- | --- |
| Woohyung  Lee, 2012 | Korea | RS | 220 | 64.5 | 77.8 | 12 | I, II, III | BI, BII, RYGJ,  RYEJ | 23.9 | 7,82 | - | 150.9 | - | - | - | - | - | - | - | - | - |
| Kyu Chul Kang, 2012 | Korea | RS | 75 | 67 | 72 | 35 | - | BI, BII, RYEJ | 23.8 | 8.03 | 7.4 | - | - | - | - | 176.77 | - | - | - | - | - |
| Jong Won Kim,  2012 | Korea | RS | 403 | 63.8 | 76.2 | 33.7 | - | RYEJ, BI, BII | 24.7 | 9.8 | - | - | - | - | - | - | - | - | - | - | - |
| Xiao-juan Zhang, 2013 | China | PS | 21 | 55.3 | 83.33 | 3 | I, II, III | BII | 22.4 | - | 7 | 140.0 | - | - | - | - | - | - | - | - | - |
| Silvia Y.  Hayashi, 2013 | Brazil | PS | 164 | 68.3 | 57.2 | 36 | - | RYEJ, RYGJ | 25.85 | 8.5 | - | 116.25 | - | - | - | 179.65 | - | - | - | - | - |
| Ji Yeong An,  2013 | Korea | PS | 64 | 62.7 | 67.2 | 12 | I | BI, BII, RYEJ | 24.7 | 10.22 | 7.2 | 149.63 | 6.6 | - | - | - | 102.6 | 43.17 | 138.13 | - | - |
| Whan Sik Kim, 2013 | Korea | PS | 15 | 62.1 | 66.67 | 12 | I, II, III | LRYGJ, LRYEJ | <30 | 13.89 | - | - | 136.9 | - | - | - | - | - | - | - | - |
| Koji Tanaka, 2013 | Japan | RS | 152 | 62.8 | 69.74 | 6 | I, II, III | BI, RYGJ | 22.6 | 9.36 | - | - | - | - | - | - | - | - | - | 118.15 | 77.9 |
| Zhe-Wei Wei, 2014 | China | RS | 67 | 65.7 | 70 | 57.4 | I, II, III, IV | BII, RYEJ | - | 14.53 | - | - | - | - | - | - | - | - | - | - | - |
| Kuo-Chung Wang,  2014 | Taiwan | RS | 69 | 70.3 | 76.8 | 67.8 | - | RYGJ, RYEJ, BI, BII | 24.8 | 15.7 | - | 149.2 | - | - | - | - | - | - | - | - | - |
| Shao-Wei Xiong, 2014 | China | RS | 54 | 52.2 | 68.52 | 6 | I, II, III, IV | LRYGJ, LRYEJ | - | - | 10.6 | 102.6 | 105.6 | - | - | - | - | - | - | - | - |
| Koji Tanaka,  2014 | Japan | RCT | 221 | 64.1 | 67.9 | 12 | - | BI, RYGJ | 22.55 | 9.22 | - | - | - | - | - | - | - | - | - | 121.5 | 88.25 |
| Yeongkeun Kwon, 2014 | Korea | RS | 49 | 65.2 | 82.3 | 24 | I, II, III | BI and BII | 25.07 | 7.58 | 7.3 | 145 | - | 120 | 75 | 162 | - | - | - | - | - |
| Zhenxin Zhu, 2015 | China | RS | 292 | 64.9 | 69.5 | 24 | - | BI, BII, RYEJ | 22.4 | 10 | - | 102.6 | 97.2 | - | - | - | - | - | - | - | - |
| Tao Liu, 2015 | China | PS | 93 | 59 | 50.54 | 12 | - | BI, RYGJ, RYEJ | 29.31 | - | 9.27 | 184.86 | - | - | - | - | - | - | - | - | - |
| Jun Pak, 2015 | Korea | RS | 90 | 65.4 | 70 | 24 | I, II, III | BI, BII, RYEJ | 24.8 | 11 | 7.1 | 151.0 | 25.6 | 119 | - | - | - | - | - | - | - |
| Ji Won Kim, 2015 | Korea | PS | 30 | 63.9 | 46.7 | 12 | I | LRYGJ | 26.8 | 15.25 | 7.6 | 144.7 | 100.8 | - | - | - | - | - | - | - | - |

**Table 1** General characteristics of the included studies.

| Te-Wei Ho, 2016 | Taiwan | RS | 579 | 57 | 67.7 | 47.1 | - | RYEJ | - | - | - | - | - | - | - | - | - | - | - | - | - |
| --- | --- | --- | --- | --- | --- | --- | --- | --- | --- | --- | --- | --- | --- | --- | --- | --- | --- | --- | --- | --- | --- |
| Yoon Young Choi, 2017 | Korea | RCT | 40 | 62.6 | 65 | 12 | I, II, III | RYGJ, BI | 25.65 | - | 7.4 | 135.15 | - | - | - | - | - | - | - | - | - |
| Ali Guner, 2017 | Korea | RS | 238 | 62.9 | 75 | 24 | I, II | BI, BII | 24.3 | - | 7.2 | 137 | 96 | - | - | - | - | - | - | - | - |
| Tae-Hoon Lee, 2017 | Korea | RS | 42 | 68.7 | 68.6 | 60 | I, II, III | BI, BII, RYEJ | 25.1 | - | 6.9 | 139.6 | 152.4 | - | - | - | - | - | - | - | - |
| Min Jeong Park, 2017 | Korea | PS | 52 | 65 | 73.08 | 12 | I, II, III | BI, BII, RYGJ, RYEJ | 24.94 | - | - | - | - | - | - | - | - | - | - | 144.70 | 128.18 |
| Xi-Hsuan Lin, 2018 | China | RS | 455 | 69.4 | 56.76 | 99 | I | BII, RYGJ | 21.6 | - | - | - | 100 | 123 | 74 | 163 | - | 54 | 81 | - | - |
| Hak Jin Kim, 2019 | Korea | PS | 66 | 62 | 65.3 | 12 | Ia, Ib | BI, BII, RYGJ, RYEJ | 25.5 | - | - | - | - | 125 | 82 | 178 | 111 | 45 | 110 | - | - |
| Young Suk Park, 2020 | Korea | PS | 40 | 60 | 80 | 12 | I | LRYGJ, RYGJ | 29.6 | 9.63 | 5.8 | - | - | 136 | 84.25 | - | - | - | - | - | - |
| You Na Kim, 2020 | Korea | RS | 1305 | 58.55 | 65.4 | 12 | Ia, Ib, IIa | BI, BII, RYGJ | 23.63 | - | - | - | - | - | - | 182 | - | - | - | - | - |
| Jong-Han Kim, 2020 | Korea | RS | 226 | 63.05 | 77 | 12 | I | LRYGJ, BII | 25.59 | 11 | 7.25 | 149.55 | - | - | - | - | - | - | - | - | - |
| Dong Peng, 2020 | China | RS | 143 | 65.1 | 63.6 | 6 | - | BI, BII, RYEJ, RYGJ | 23.4 | 12.82 | - | - | - | - | - | - | - | - | - | - | - |
| Ji Yeon Park, 2021 | Korea | PS | 20 | 60.1 | 70 | 6 | I, II | BI, LBII, LRYGJ | 25.8 | 8.91 | 7.8 | 121.4 | 36 | - | - | - | - | - | - | - | - |
| Young Ki Lee, 2021 | Korea | PS | 41 | 62.4 | 80.5 | 12 | Ia, Ib | BI, BII,  RYGJ, RYEJ | 24.5 | 6.45 | 7.3 | 132.5 | 81.6 | - | - | - | - | - | - | - | - |
| Yun Suk Choi, 2022 | Korea | RS | 48 | 60.73 | 83.1 | 12 | I, II | LRYGJ, LRYEJ | 23.77 | 11.34 | 7.45 | 122.21 | - | - | - | - | - | - | - | - | - |

GC: Gastric Cancer; BMI: Body Mass Index; HbA1c: Hemoglobin A1c; FPG: Fasting Plasma Glucose; T2DM: Type 2 Diabetes Mellitus; SBP: Systolic Blood Pressure; DBP: Diastolic Blood Pressure; TC: Total Cholesterol; LDL: Low Density Lipoprotein; HDL: High Density Lipoprotein; TG: Triglycerides; SFA: Subcutaneous Fat Area; VFA: Visceral Fat Area; RS: Retrospective Study; PS: Prospective Study; BI: Billroth I; BII: Billroth II; RYGJ: Roux-en-Y Gastrojejunostomy; RYEJ: Roux-en-Y Esophagojejunostomy; LRYGJ: Long-limb Roux-en-Y Gastrojejunostomy; LRYTG: Long-limb Roux-en-Y Esophagojejunostomy.
